# Supplementary material for: Dissociating Cortical Activity during Processing of Native and Non-Native Audiovisual Speech from Early to Late Infancy
Source: PubMed Central journal article supplement (PMC4194034; doi:10.3390/brainsci4030471), 2014-08-11
Supplement: brainsci-04-00471-s001.pdf [file brainsci-04-00471-s001.pdf]

## Supplementary Information

**Table S1.** Changes in relative concentration of HbO following initiation of the test event, by neural region and stimulus condition. Cells contain  $\mu\text{M}$  (SE)  $\mu\text{Molar cm}$  averaged from 5 to 20 s.

| Neural Region   | Stimulus Condition | Age Group      |               |               |
|-----------------|--------------------|----------------|---------------|---------------|
|                 |                    | 3–6 Months     | 7–10 Months   | 11–14 Months  |
| Right Anterior  | Native             | −0.58 (0.55) * | 2.37 (0.76) + | −5.37 (0.66)  |
|                 | Non-Native         | 10.40 (0.33)   | −1.61 (0.35)  | −3.64 (1.19)  |
| Right Posterior | Native             | −1.37 (0.87) + | −4.36 (0.29)  | −1.52 (1.23)  |
|                 | Non-Native         | −10.3 (0.63)   | −5.13 (0.45)  | −2.79 (1.64)  |
| Left Anterior   | Native             | 1.87 (0.80) +  | 1.22 (0.40)   | 7.99 (1.00) * |
|                 | Non-Native         | 1.11 (0.31)    | −0.74 (0.85)  | −3.80 (0.85)  |
| Left Posterior  | Native             | 0.13 (0.60) ** | −0.35(0.41) * | 8.71 (1.37) * |
|                 | Non-Native         | 3.84 (0.72)    | −1.44 (0.51)  | −1.00 (0.99)  |

\* Native versus Non-Native values within this cell are significantly different,  $p \leq 0.001$ .; \*\* Native versus Non-Native values within this cell are significantly different,  $p < 0.05$ .; + The HbO Native and Non-Native values are significantly different from each other, but do not remain significant. After correcting for multiple comparisons. As such, these differences are not discussed in the manuscript.

**Table S2.** Changes in relative concentration of HbR concentration following initiation of the test event, by neural region and condition. Cells contain  $\mu\text{M}$  (SE)  $\mu\text{Molar cm}$  averaged from 5 to 20 s.

| Neural Region   | Stimulus Condition |              |              |                   |              |              |
|-----------------|--------------------|--------------|--------------|-------------------|--------------|--------------|
|                 | Native Speech      |              |              | Non-Native Speech |              |              |
|                 | 3–6 Months         | 7–10 Months  | 11–14 Months | 3–6 Months        | 7–10 Months  | 11–14 Months |
| Right Anterior  | −0.25 (0.23)       | −0.80 (0.27) | −0.43 (0.67) | −1.22 (0.14)      | 2.18 (0.20)  | −3.92 (0.51) |
| Right Posterior | 0.83 (0.19)        | −2.55 (0.38) | 1.34 (0.44)  | −1.52 (0.29)      | −4.47 (0.28) | 1.92 (0.52)  |
| Left Anterior   | 0.79 (0.18)        | 0.00 (0.16)  | −0.09 (0.62) | −2.30 (0.24)      | −0.03 (0.16) | −0.83 (0.39) |
| Left Posterior  | −3.20 (0.42)       | 1.86 (0.18)  | −0.19 (0.80) | −3.62 (0.82)      | 0.44 (0.27)  | 0.36 (0.55)  |

© 2014 by the authors; licensee MDPI, Basel, Switzerland. This article is an open access article distributed under the terms and conditions of the Creative Commons Attribution license (<http://creativecommons.org/licenses/by/3.0/>).
